# Supplementary material
Source: PubMed Central journal article supplement (PMC4871318)

blot for Figure 5j

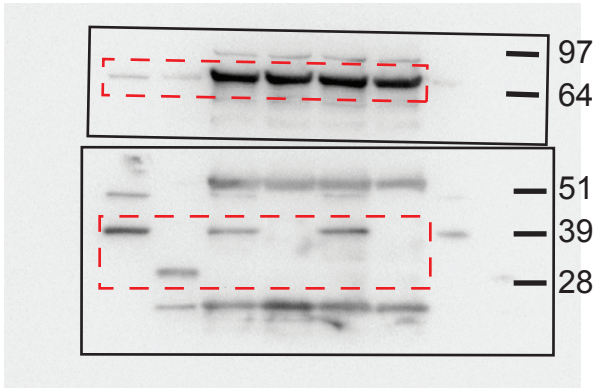

blot for Suppl. Figure 5q

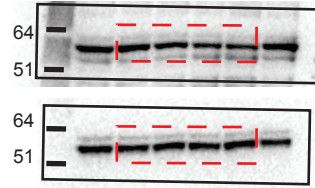

blot for Figure 6b

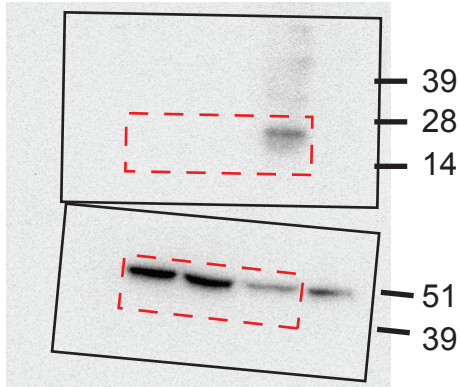

blot for Suppl. Fig. 7h (upper)

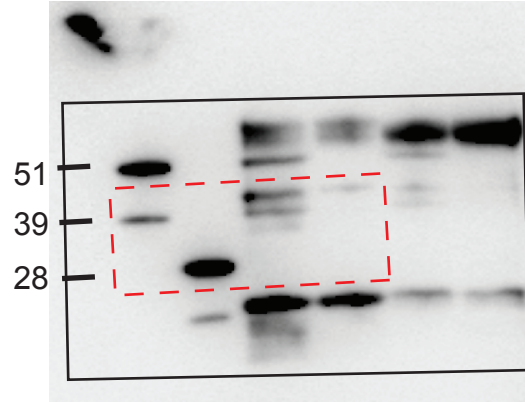

blot for Figure 6i

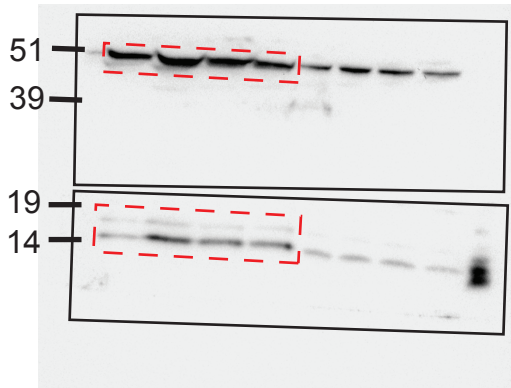

blot for Suppl. Fig. 7h (lower)

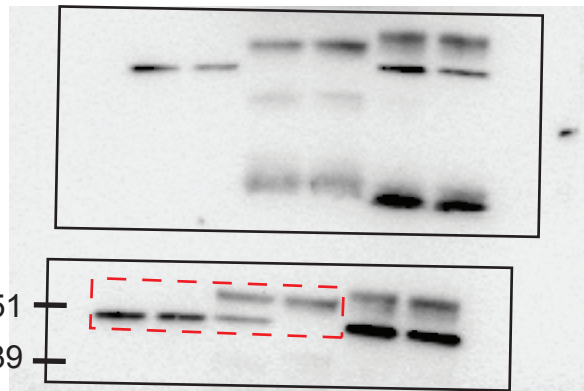

blot for Suppl. Fig. 2f

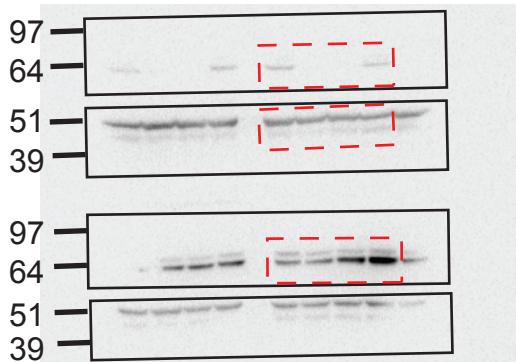

blot for Suppl. Fig. 7i

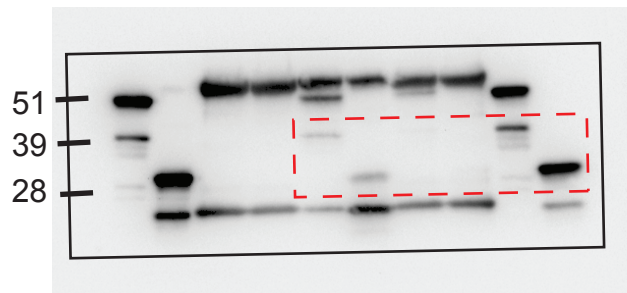

blot for Suppl. Fig. 7j

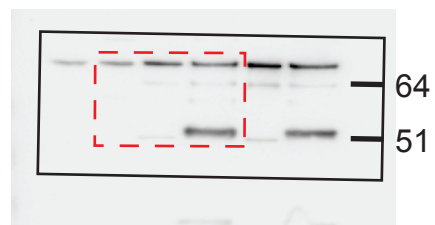

Supplement: NIHMS757976-supplement-exdata_fig9.pdf [file NIHMS757976-supplement-exdata_fig9.pdf]
