# Supplementary material
Source: PubMed Central journal article supplement (PMC4871318)

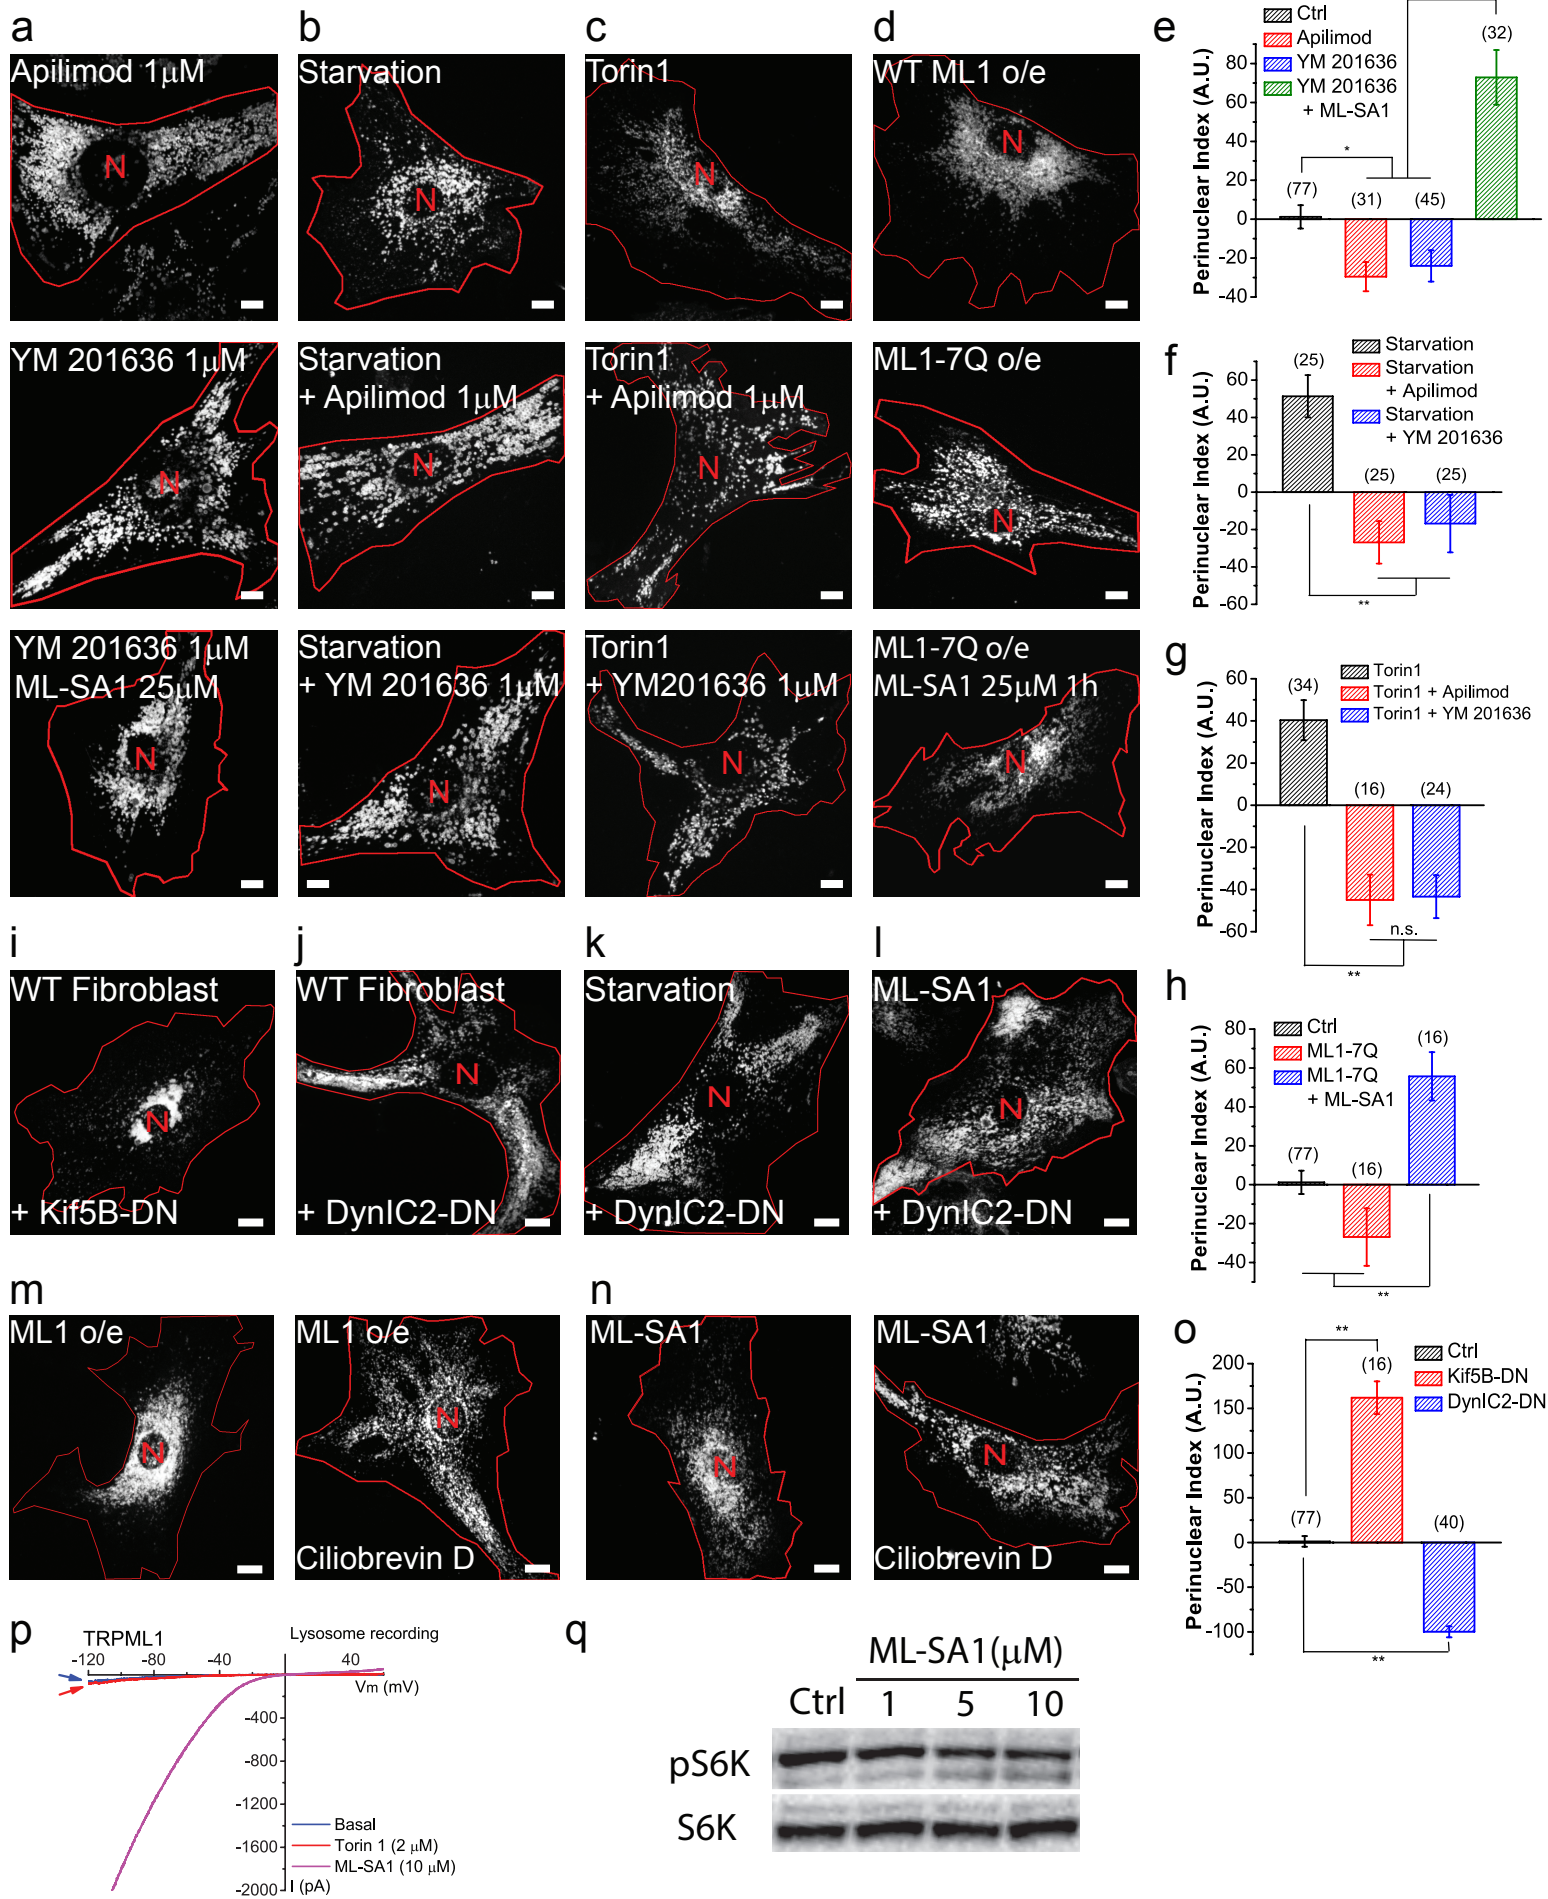

Supplement: NIHMS757976-supplement-exdata_fig5.pdf [file NIHMS757976-supplement-exdata_fig5.pdf]
